# Supplementary material for: Diatom diversity and distribution in neotropical karst lakes under anthropogenic stress
Source: Copernicus journal article supplement (doi:10.5194/egusphere-2024-914), 2024-05-15
Supplement: Supplementary file 1 [file egusphere-2024-914-supplement.pdf]

**Coccinodiscophyceae**

Aulacoseirales

**Code**

## Aulacoseiraceae

*Aulacoseira granulata* (Ehrenberg) Simonsen 1979

AulGra

*Aulacoseira granulata* var. *angustissima* (Müller) Simonsen 1979

AulAng

*Aulacoseira* aff. *islandica* (O.Müller) Simonsen 1979

AulIsl

**Mediophyceae**

Stephanodiscales

## Stephanodiscaceae

*Cyclotella petenensis* Sylvestre, Paillès & Escobar 2018

CycPet \*\*

*Discostella pseudostelligera* (Hustedt) Houk & Klee 2004

DisPse

*Discostella stelligera* (Cleve & Grunow) Houk & Klee 2004

DisSt

*Discostella* sp.*Stephanocyclus meneghinianus* (Kützing) Kulikovskiy, Genkal & Kociolek 2022

SteMen

*Stephanodiscus hantzschii* Grunow 1880

SteHan

**Bicllariophyceae****Fragilariophycidae**

Fragilariales

## Staurosiraceae

*Staurosira construens* Ehrenberg 1843

StaCon

*Staurosira venter* (Ehrenberg) Cleve & Möller 1879

StaCnv

Licmophorales

## Ulnariaceae

*Ulnaria delicatissima* (W.Smith) Aboal & P.C.Silva 2004

UlnDeli

*Ulnaria ulna* (Nitzsch) Compère 2001

UlnUln

**Eunotiophycidae**

Eunotiales

## Eunotiaceae

*Eunotia incisa* Smith ex Gregory 1854

EunInc

*Eunotia monodon* Ehrenberg 1843

EunMon

*Eunotia pectinalis* (Kützing) Rabenhorst 1864

EunPec

**Bacillariophycidae**

Cocconeidales

## Achnanthidiaceae

*Achnanthidium minutissimum* (Kützing) Czarnecki 1994

AchMin

*Gogorevia exilis* (Kützing) Kulikovskiy & Kociolek 2020

GogExi

*Planothidium* sp.

PlaSp

Naviculales

|                   |                                                                     |           |
|-------------------|---------------------------------------------------------------------|-----------|
| Amphipleuraceae   | <i>Halamphora veneta</i> (Kützing) Levkov 2009                      | HmpVen    |
| Brachysiraceae    | <i>Brachysira longirostris</i> (Hustedt) D.G.Mann 1990              | BraLon ** |
|                   | <i>Brachysira vitrea</i> (Grunow) Ross 1966                         | BraVit    |
|                   | <i>Nupela</i> sp.                                                   | NupSp     |
| Catenulaceae      | <i>Amphora copulata</i> (Kützing) Schoeman & Archibald 1986         | AmpCop    |
| Diadesmidaceae    | <i>Luticola mutica</i> (Kützing) Mann 1990                          | LutMut    |
| Diploneidaceae    | <i>Diploneis ovalis</i> (Hilse) Cleve 1891                          | DipOva    |
| Naviculaceae      | <i>Navicula cryptocephala</i> Kützing 1844                          | NavCry    |
|                   | <i>Navicula gregaria</i> Donkin 1861                                | NavGre    |
|                   | <i>Navicula radiosa</i> Kützing 1844                                | NavRad    |
| Neidiaceae        | <i>Neidium ampliatum</i> (Ehrenberg) Krammer 1985                   | NeiAmp    |
| Pinnulariaceae    | <i>Pinularia brauniana</i> (Grunow) Studnicka 1888                  | PinBra    |
| Sellaporaceae     | <i>Sellaphora pupula</i> (Kützing) Mereschkovsky 1902               | SelPup    |
|                   | <i>Sellaphora</i> sp.                                               | SelSp     |
| Cymbellales       |                                                                     |           |
| Cymbellaceae      | <i>Cymbopleura hustedtii</i> (Krasske) Novelo, Tavera & Ibarra 2007 | CybHus    |
|                   | <i>Cymbella mexicana</i> (Ehrenberg) Cleve 1894                     | CymMex    |
| Gomphonemataceae  | <i>Encyonema neogracile</i> Krammer 1997                            | EncNeo    |
|                   | <i>Encyonema silesiacum</i> (Bleisch) Mann 1990                     | EncSil    |
|                   | <i>Encyonema densistriatum</i> Novelo, Tavera & Ibarra 2007         | EncDen    |
|                   | <i>Encyonema</i> sp.                                                | EncSp     |
|                   | <i>Encyonopsis microcephala</i> (Grunow) Krammer 1997               | EnyMic    |
|                   | <i>Encyonopsis</i> sp.                                              | EncSp     |
|                   | <i>Gomphonema pygmaeum</i> Kociolek & Stoermer 1991                 | GomPyg    |
| Rhoicospheniaceae | <i>Rhoicosphenia abbreviata</i> (C.Agardh) Lange-Bertalot 1980      | RhoAbr    |

|               |                |                                                                                |        |    |
|---------------|----------------|--------------------------------------------------------------------------------|--------|----|
| Mastogloiales | Mastogloiaceae |                                                                                |        |    |
|               |                | <i>Mastolgoia calcarea</i> Lee, Gaiser, Van de Vijver, Edlund & Spaulding 2014 | MasCal | ** |
|               |                | <i>Mastogoa elliptica</i> (Agardh) Cleve 1893                                  | MasEli | ** |
| Bacillariales | Bacillariaceae |                                                                                |        |    |
|               |                | <i>Hantzschia amphioxys</i> (Ehrenberg) Grunow 1880                            | HanAm  |    |
|               |                | <i>Nitzschia acicularis</i> (Kützing) W.Smith 1853                             | p      |    |
|               |                | <i>Nitzschia amphibioides</i> Hustedt 1942                                     | NitAsc |    |
|               |                | <i>Nitzschia palea</i> (Kützing) W.Smith 1856                                  | NitAmb |    |
|               |                |                                                                                | NitPal |    |
| Rhopalodiales | Rhopalodiaceae |                                                                                |        |    |
|               |                | <i>Epithemia reicheltii</i> Fricke 1904                                        | EpiRei | ** |

Table S1. Taxonomic list of the diatom taxa found in the studied lakes in Chiapas. \*\* = new record for Mexico according to the Continental Algae Database (bdLACET, Novelo & Tavera, 2021).

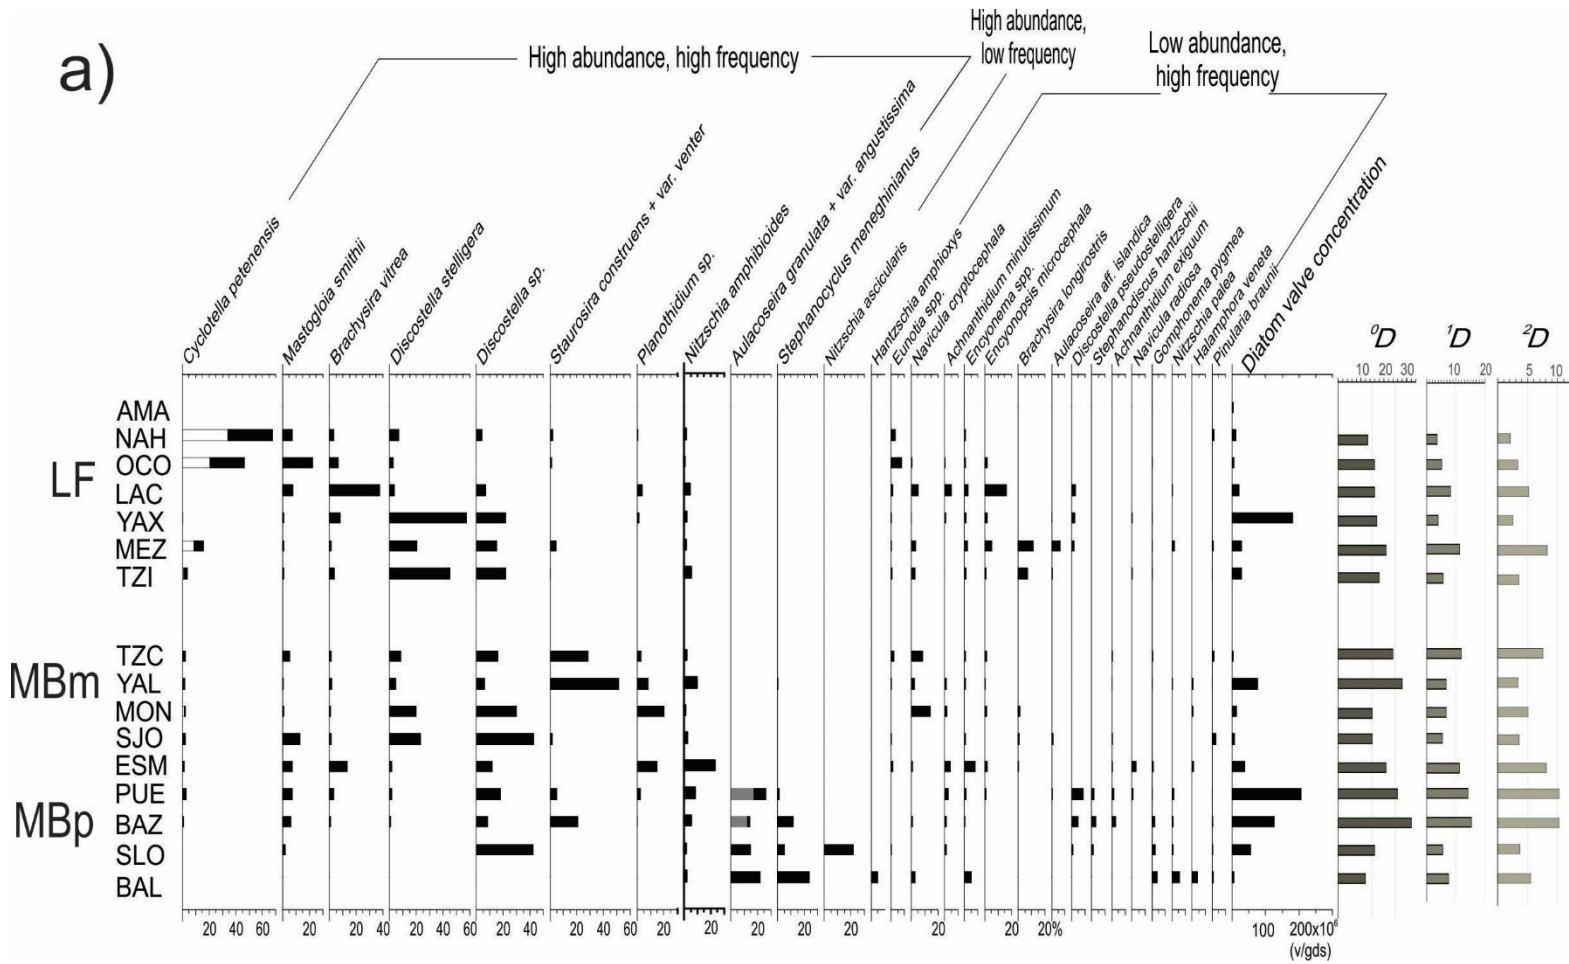

Figure S1. Relative abundances of the diatom taxa present in the studied karstic lakes in southern Mexico. White bars in *Cyclotella petenensis* represent the percentage of valves showing dissolution.
